# Supplementary material
Source: publisher figshare collection journal article supplement (https://wiley.figshare.com/articles/dataset/_/3556851)
Supplement: Supplementary file 1 [file 1 › appendix-A.htm]

Ecological Archives E094-135-A1


*Ecological Archives* E094-135-A1

Lennart Persson, André M. de Roos. 2013. Symmetry breaking in ecological systems through different energy efficiencies of juveniles and adults. *Ecology* 94:1487–1498. http://dx.doi.org/10.1890/12-1883.1

Appendix A. Description of the fully size-structured model and parameter domains of ontogenetic asymmetry and ontogenetic symmetry.

> View / download PDF.


---

[Back to E094-135]
